# Supplementary material for: Effect of laser acupuncture on obesity: study protocol for a randomized controlled trial
Source: PubMed Central journal article supplement (PMC4440285; doi:10.1186/s13063-015-0748-4), 2015-05-15
Supplement: 13063_2015_748_MOESM1_ESM.pdf [file 13063_2015_748_MOESM1_ESM.pdf]

**Additional file 1. Anatomical locations of the acupuncture points**

| <b>Acupuncture point</b> | <b>Anatomical location</b>                                                                                                        | <b>Function according to TCM</b>                                            |
|--------------------------|-----------------------------------------------------------------------------------------------------------------------------------|-----------------------------------------------------------------------------|
| ST 25                    | Middle of the abdomen, 2 cun lateral to the umbilicus.                                                                            | Regulates spleen, stomach, and intestines.                                  |
| ST 36                    | 3 cun below patella, 1 cun lateral of the tibial rim.                                                                             | Strengthens spleen and stomach.                                             |
| ST 40                    | At the midpoint of a line between ST35 at the lateral patella and the lateral malleolus.                                          | Transforms phlegm and dampness.                                             |
| ST 44                    | Proximal to the web margin between the 2nd and 3rd metatarsal toes, at the junction of the red and white skin.                    | Clears heat from stomach, resolves damp heat.                               |
| LI 4                     | On the dorsum of the hand, between the 1st and 2nd metacarpal bones, in the middle of the 2nd metacarpal bone on the radial side. | Expels wind and releases the exterior, tonifies qi and strengthens immunity |
| LI 11                    | With the elbow flexed, the point is on the lateral end of the transverse cubital crease.                                          | Clears heat, cools blood, resolves dampness, expels exterior wind.          |
| SP 6                     | 3 cun above the medial malleolus, dorsal tibial rim.                                                                              | Strengthens spleen and stomach, resolves dampness.                          |
| PC 6                     | 2 cun above the transverse crease of the wrist, between the tendons of m. palmaris longus and m. flexor carpi radialis.           | Regulates heart qi, calms the shen, harmonizes stomach.                     |
